# Supplementary material for: Technical Advancements for Studying Immune Regulation of Disseminated Dormant Cancer Cells
Source: Frontiers journal article supplement (doi:10.3389/fonc.2020.594514), 2020-11-04
Supplement: Data_Sheet_1.PDF [file Data_Sheet_1.PDF]

| TME compartment                              | Marker      |        |       | Localisation  | Population identified       | Notes                                                                                                                                                                                                                                                                                                                                                                   |
|----------------------------------------------|-------------|--------|-------|---------------|-----------------------------|-------------------------------------------------------------------------------------------------------------------------------------------------------------------------------------------------------------------------------------------------------------------------------------------------------------------------------------------------------------------------|
| Immune compartments                          | CD45        |        |       | Membrane      | Immune cells                | All immune cells express CD45 and can be broadly divided in myeloid cells and lymphoid cells due to the presence of either CD11b or CD3 on their membrane. However, exceptions exist as for the NK cells that are still considered lymphoid cells though they are CD3 negative and some express CD11b.                                                                  |
|                                              |             | CD11b  |       | Membrane      | Myeloid cells               |                                                                                                                                                                                                                                                                                                                                                                         |
|                                              |             |        | Ly6G  | Membrane      | Neutrophils                 |                                                                                                                                                                                                                                                                                                                                                                         |
|                                              |             |        | CD14  | Membrane      | Monocytes                   |                                                                                                                                                                                                                                                                                                                                                                         |
|                                              |             |        | F4/80 | Membrane      | Macrophages                 |                                                                                                                                                                                                                                                                                                                                                                         |
|                                              |             |        | CD11c | Membrane      | Dendritic cells             |                                                                                                                                                                                                                                                                                                                                                                         |
|                                              |             | CD3    |       | Membrane      | T cells                     |                                                                                                                                                                                                                                                                                                                                                                         |
|                                              |             |        | CD4   | Membrane      | Helper T cells              |                                                                                                                                                                                                                                                                                                                                                                         |
|                                              |             |        | FoxP3 | Intracellular | Regulatory T cells          |                                                                                                                                                                                                                                                                                                                                                                         |
|                                              |             |        | CD8   | Membrane      | Cytotoxic T cells           |                                                                                                                                                                                                                                                                                                                                                                         |
|                                              |             | NKp46  |       | Membrane      | NK cells                    |                                                                                                                                                                                                                                                                                                                                                                         |
|                                              |             | CD19   |       | Membrane      | B cells                     |                                                                                                                                                                                                                                                                                                                                                                         |
| Endothelial compartment (CD45 <sup>-</sup> ) | Endomucin   |        |       | Membrane      | Endothelial cells           | Endothelial cells are often present in tumour. CD31 is a traditionally that has been largely used to identify them by FACS.                                                                                                                                                                                                                                             |
|                                              | VE-cadherin |        |       | Membrane      | Endothelial cells           |                                                                                                                                                                                                                                                                                                                                                                         |
|                                              | CD31        |        |       | Membrane      | Endothelial cells           |                                                                                                                                                                                                                                                                                                                                                                         |
|                                              |             | Lyve-1 |       | Membrane      | Lymphatic endothelial cells |                                                                                                                                                                                                                                                                                                                                                                         |
| Mesenchymal compartment (CD45 <sup>-</sup> ) | FAP         |        |       | Intracellular |                             | Cancer-Associated Fibroblasts (CAFs) represent the most abundant mesenchymal non-immune component in the TME. The origin of CAF heterogeneity remains debated and there is not a single marker able to recognise all CAFs.                                                                                                                                              |
|                                              | aSMA        |        |       | Intracellular |                             |                                                                                                                                                                                                                                                                                                                                                                         |
|                                              | Vimentin    |        |       | Intracellular |                             |                                                                                                                                                                                                                                                                                                                                                                         |
|                                              | CD29        |        |       | Membrane      |                             |                                                                                                                                                                                                                                                                                                                                                                         |
|                                              | Ly6A        |        |       | Membrane      |                             |                                                                                                                                                                                                                                                                                                                                                                         |
|                                              | PDGFRb      |        |       | Membrane      |                             |                                                                                                                                                                                                                                                                                                                                                                         |
| Parenchymal compartment (CD45 <sup>-</sup> ) | Epcam       |        |       | Membrane      | Epithelial cells            | In most solid tumour the parenchymal cells are mainly represented by the host tissue epithelial cells. Epcam is a membrane marker commonly used to identify epithelial cells. However, there are markers specific for each particular tissue that might be useful to more clearly identify epithelial cells, including local subpopulations that can be Epcam negative. |
